# Supplementary material
Source: Springer Nature journal article supplement (https://www.springermedizin.de/resource/supplementary/13058_2012_3162_MOESM2_ESM.pdf/9703394)
Supplement: MOESM2 [file 9703394]

**Table 1: Characteristics of patients tested for germline *BRCA1* and *BRCA2* mutations**

| Characteristics                                                                       | Total (n=431) |      | BRCA mutations |      |
|---------------------------------------------------------------------------------------|---------------|------|----------------|------|
|                                                                                       | Number        | (%)  | Number         | (%)  |
| <b>Female breast, age at index diagnosis, y</b>                                       |               |      |                |      |
| ≤30                                                                                   | 50            | 11.6 | 10             | 20.0 |
| 31-40                                                                                 | 164           | 38.1 | 30             | 18.3 |
| 41-50                                                                                 | 144           | 33.4 | 16             | 11.1 |
| >50                                                                                   | 73            | 16.9 | 9              | 12.3 |
| <b>Breast or ovarian cancers in family (1° and 2° only)</b>                           |               |      |                |      |
| Female breast                                                                         | 217           | 50.3 | 41             | 18.9 |
| Female ovary                                                                          | 19            | 4.4  | 9              | 47.4 |
| <b>Manchester score</b>                                                               |               |      |                |      |
| ≤10                                                                                   | 205           | 47.6 | 11             | 5.4  |
| 11-17                                                                                 | 146           | 33.9 | 26             | 17.8 |
| ≥18                                                                                   | 80            | 18.6 | 28             | 35.0 |
| <b>Ancestry</b>                                                                       |               |      |                |      |
| Malay                                                                                 | 115           | 26.7 | 17             | 14.8 |
| Chinese                                                                               | 248           | 57.5 | 31             | 12.5 |
| Indian                                                                                | 59            | 13.7 | 15             | 25.4 |
| Others                                                                                | 9             | 2.1  | 2              | 22.2 |
| <b>Referral characteristic</b>                                                        |               |      |                |      |
| Early onset ≤35, regardless of family history                                         | 131           | 30.4 | 25             | 19.1 |
| 2 cases of breast cancer, 1 <50                                                       | 126           | 29.2 | 21             | 16.7 |
| 3 cases of breast or ovarian cancer                                                   | 76            | 17.6 | 25             | 32.9 |
| 1 case of bilateral breast cancer <50, in index or 1° and 2° relative                 | 39            | 9.0  | 13             | 33.3 |
| 1 case of breast and ovarian cancer in same individual in index or 1° and 2° relative | 8             | 1.9  | 4              | 50.0 |
| Triple negative breast cancer, ≤50                                                    | 98            | 22.7 | 23             | 23.5 |

A total of 431 breast cancer patients were analysed for germline mutations in *BRCA1* and *BRCA2* by DNA sequencing and multiple ligation dependent probe amplification (MLPA) analysis. Table 1 shows the distribution of patients according to their age at diagnosis, family history of breast and ovarian cancer in first- and second degree relatives, Manchester score and self-declared ethnicity, and the prevalence of *BRCA1* and *BRCA2* mutations in each category.
